# Supplementary material
Source: PubMed Central journal article supplement (PMC3336833)
Supplement: supp_the2012-0007_T12-07PR_Pusztai_Suppl.pdf [file supp_the2012-0007_T12-07PR_Pusztai_Suppl.pdf]

**\*\*Supplementary Data is for On-line Consideration Only\*\***

Supplementary data 1

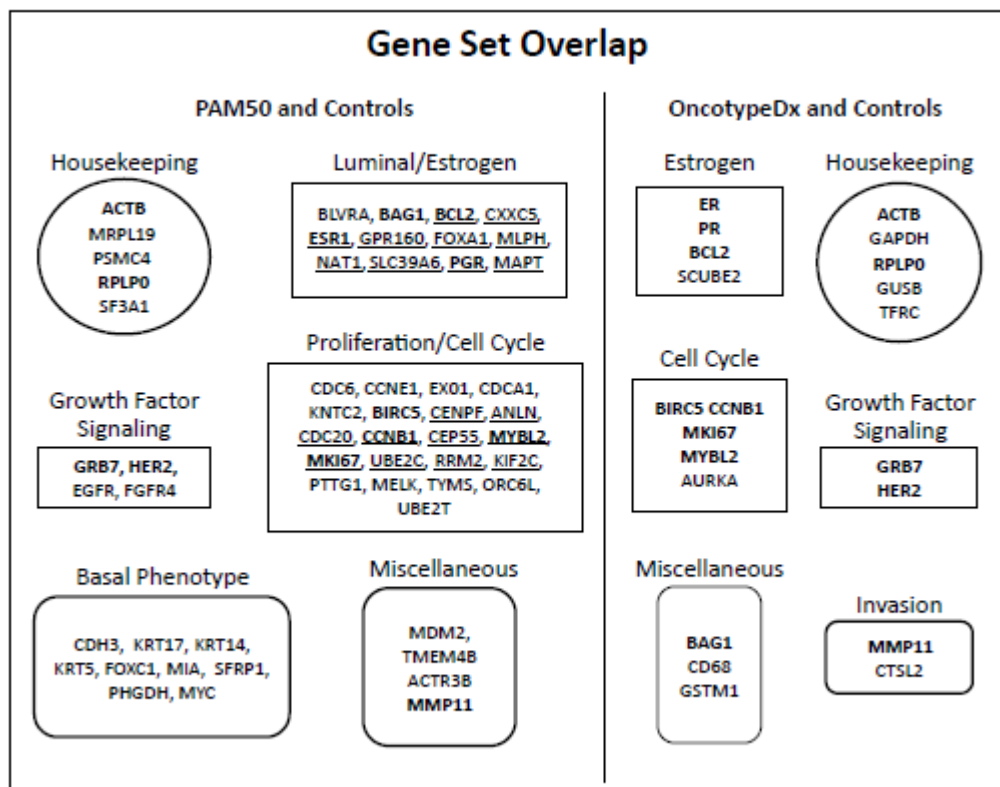

Supplementary data 2

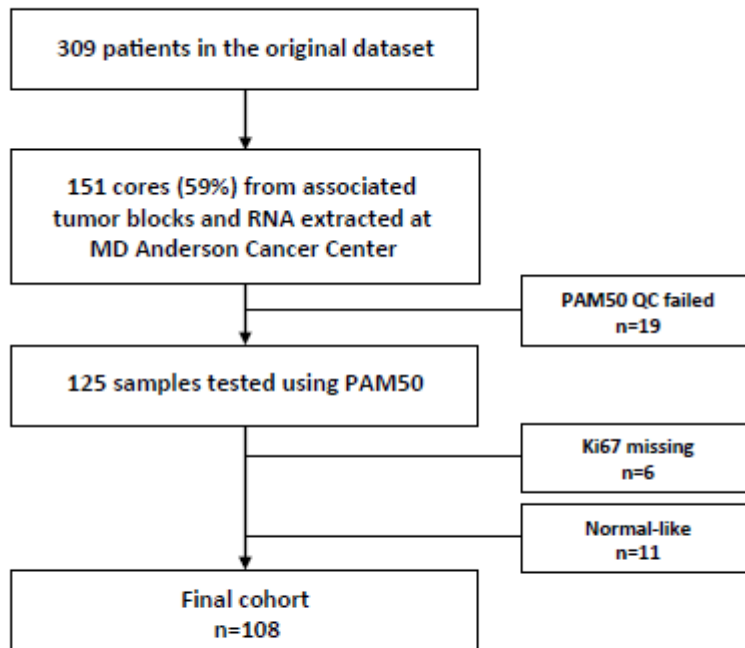

Figure 1

Supplementary data 3

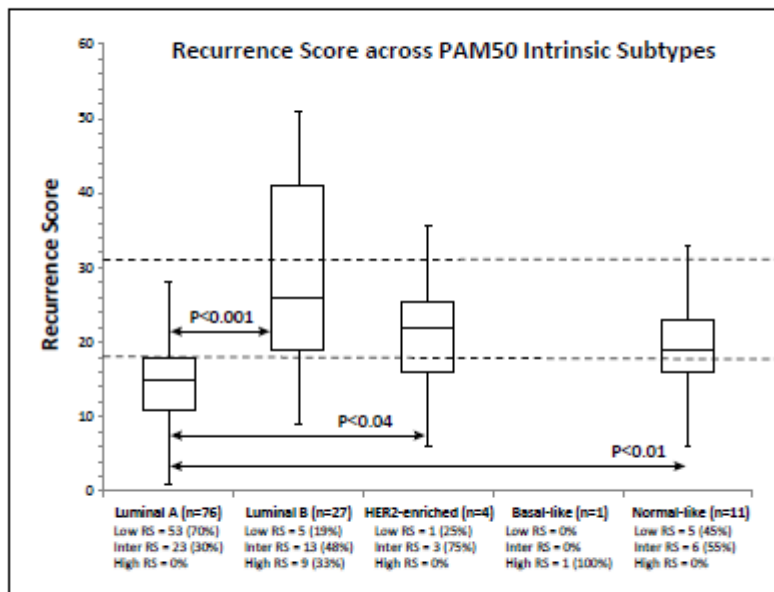

Supplementary data 4

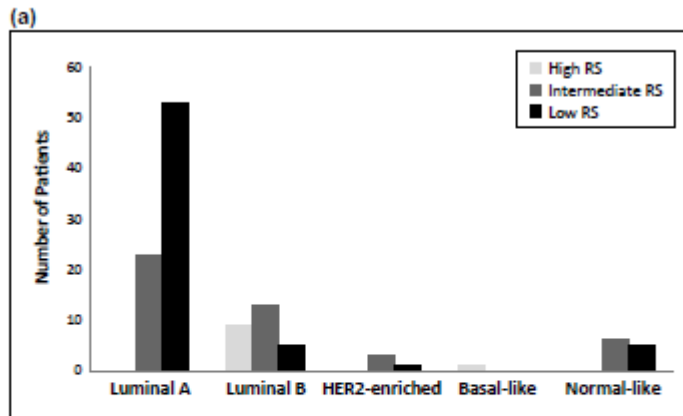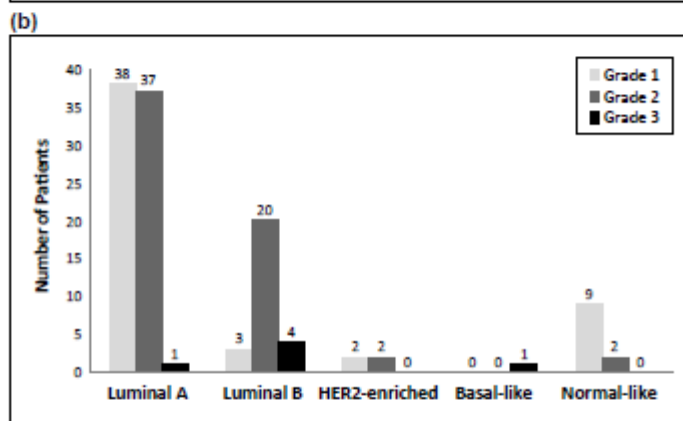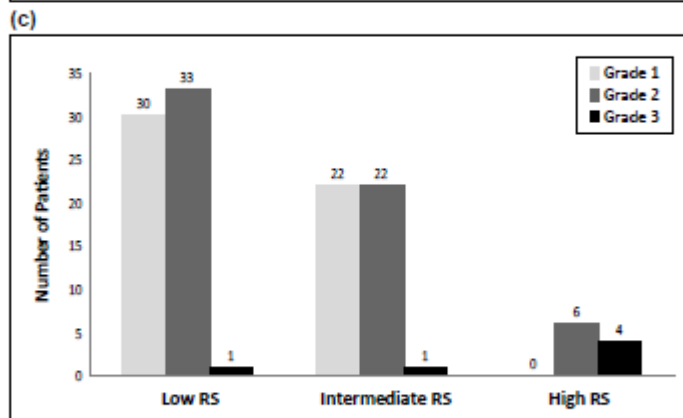

(a) classification of 119 tumors by RS and PAM50 (b) histologic grade and RS (c) histologic grade and PAM50
